# Supplementary material for: Effect of Antioxidants on High-Temperature Stability of Renewable Bio-Oils Revealed by an Innovative Method for the Determination of Kinetic Parameters of Oxidative Reactions
Source: MDPI journal article supplement (doi:10.3390/antiox9050399), 2020-05-08
Supplement: s1 [file s1]

## Supplementary Materials

# Effect of antioxidants on high-temperature stability of renewable bio-oils revealed by an innovative method for the determination of kinetic parameters of oxidative reactions

Fabio Mollica<sup>1</sup>, Marco Lucarini<sup>1</sup>, Cinzia Passerini<sup>2</sup>, Claudio Carati<sup>2</sup>, Silvia Pavoni<sup>2</sup>, Lucia Bonoldi,<sup>2</sup> Riccardo Amorati<sup>1\*</sup>

<sup>1</sup> Department of Chemistry «G. Ciamician» University of Bologna, via S. Giacomo 11, 40126, Bologna, Italy

<sup>2</sup> Research and Technological Innovation Department, Eni SpA, Via F. Maritano 26, I-20097 San Donato Milanese, Italy

| Content:                                                                                                                  | Page |
|---------------------------------------------------------------------------------------------------------------------------|------|
| <b>Table s1.</b> Oil characteristics: peroxide value (PV) in mEq O <sub>2</sub> /Kg, and full elementary analysis in ppm. | 2    |
| Derivation of equation for inhibited autoxidation.                                                                        | 4    |

**Table s1.** Oil characteristics: peroxide value (PV) in meq. O<sub>2</sub>/Kg, and full elementary analysis in ppm.

|               | Oil <sup>[a]</sup>               | PV   | Al   | Ca    | K     | Mg    | Na    | Zn   | Sn   | P     |
|---------------|----------------------------------|------|------|-------|-------|-------|-------|------|------|-------|
| <b>Type A</b> |                                  |      |      |       |       |       |       |      |      |       |
| BIO26         | Refined Used Cooking Oil (T)     | 14.8 | <0.5 | 1.5   | 12.8  | 1.0   | 13.5  | 0.8  | <0.5 | 3.8   |
| BIO44         | Used Cooking Oil (T)             | 8.1  | <0.5 | 3.5   | 25.6  | 2.3   | 39.9  | 0.7  | <0.5 | 14.2  |
| BIO57         | Oil Distillation pitch (T)       | na   | 36.0 | 828.0 | 13.0  | 610.0 | 487.0 | 11.3 | 5.3  | 394.0 |
| BIO65         | Vegetable oil fraction (T)       | 13.0 | <0.5 | <0.5  | 8.6   | <0.5  | 1.0   | <0.5 | <0.5 | 2.4   |
| BIO84         | Safflower oil (T)                | 9.6  | <0.5 | <0.5  | <0.5  | <0.5  | <0.5  | <0.5 | <0.5 | <0.5  |
| BIO85         | Linseed oil (T)                  | 12.0 | <0.5 | 2.9   | 2.1   | 2.7   | <0.5  | 0.5  | <0.5 | 18.1  |
| BIO130        | Tall oil (1) (A) <sup>[d]</sup>  | 19.4 | <0.5 | 3.0   | 6.8   | <0.5  | 76.1  | <0.5 | <0.5 | 10.6  |
| BIO131        | Tall oil (2) (A) <sup>[d]</sup>  | 21.2 | <0.5 | 7.4   | 10.0  | <0.5  | 156.0 | <0.5 | <0.5 | 12.3  |
| BIO132        | Tall oil (3) (A) <sup>[d]</sup>  | 18.9 | <0.5 | 3.1   | 8.1   | <0.5  | 81.3  | <0.5 | <0.5 | 10.6  |
| BIO145        | Tall oil fatty acid (A)          | na   | <0.5 | <0.5  | <0.5  | <0.5  | <0.5  | <0.5 | <0.5 | <1    |
| <b>Type B</b> |                                  |      |      |       |       |       |       |      |      |       |
| BIO19         | Palm oil (T)                     | 10.9 | 2.0  | 18.6  | 10.6  | 5.1   | <0.5  | <0.5 | <0.5 | 17.6  |
| BIO22         | Soybean oil (T)                  | 10.1 | <0.5 | 69.0  | 19.9  | 30.1  | 0.6   | 1.3  | <0.5 | 85.0  |
| BIO23         | Fractioned Seed rape oil (M,D,T) | 11.8 | <0.5 | 2.4   | 5.2   | <0.5  | 125.0 | <0.5 | <0.5 | 8.3   |
| BIO38         | Corn oil (T)                     | 10.8 | <0.5 | 0.5   | <0.5  | <0.5  | <0.5  | <0.5 | <0.5 | <0.5  |
| BIO54         | Animal fat (T)                   | 13.4 | <0.5 | 4.0   | 27.2  | 3.3   | 46.8  | 0.7  | <0.5 | 90.0  |
| BIO61         | Empty fruit bunch (T)            | na   | 0.6  | 12.6  | 7.2   | 1.4   | <0.5  | 0.6  | <0.5 | 9.4   |
| BIO62         | Carinata oil (T)                 | 11.0 | <0.5 | 2.8   | 1.3   | 0.6   | <0.5  | <0.5 | <0.5 | 4.6   |
| BIO68         | Castor oil (D,T)                 | 13.9 | 0.6  | 6.7   | 2.8   | 1.5   | 0.7   | <0.5 | <0.5 | 5.2   |
| BIO73         | RBD Palm oil (T)                 | na   | na   | na    | na    | na    | na    | na   | na   | na    |
| BIO86         | Jojoba Oil                       | 5.2  | <0.5 | 4.2   | 3.4   | 4.3   | <0.5  | 0.5  | <0.5 | 8.5   |
| BIO87         | Cotton Oil (T)                   | 10.3 | <0.5 | <0.5  | <0.5  | <0.5  | <0.5  | <0.5 | <0.5 | <1    |
| BIO109        | Canapa Oil (T)                   | 11.2 | <0.5 | 59.4  | 140.0 | 10.8  | 2.8   | <0.5 | 0.7  | 65.4  |

|               |                            |      |      |      |      |      |      |      |      |      |
|---------------|----------------------------|------|------|------|------|------|------|------|------|------|
| BIO113        | Palm kernel oil (T)        | 23.5 | <0.5 | 1.2  | <0.5 | <0.5 | <0.5 | <0.5 | <0.5 | <1   |
| BIO128        | Animal fat (ME)            | na   | na   | na   | na   | na   | na   | na   | na   | na   |
| BIO146        | Tobacco oil (T)            | 9.8  | 0.6  | 13.4 | 52.1 | 12.9 | <0.5 | 1.4  | <0.5 | 20.6 |
| BIO171        | Fatty acids (ME)           | na   | <0.5 | 0.8  | 1.6  | <0.5 | 2.2  | <0.5 | <0.5 | 0.9  |
| BIO185        | Palm oil mill effluent (A) | 12.9 | 2.4  | 46.0 | 28.3 | 1.7  | 0.7  | 0.7  | <0.5 | 20.0 |
| BIO210        | Fatty acids (ME)           | 9.7  | <0.5 | <0.5 | <0.5 | <0.5 | <0.5 | <0.5 | <0.5 | <1   |
| <b>TYPE C</b> |                            |      |      |      |      |      |      |      |      |      |
| BIO77         | C10SE1 (BE) <sup>[e]</sup> | 12.1 | na   | na   | na   | na   | na   | na   | na   | na   |
| BIO69         | C10SE2 (BE) <sup>[e]</sup> | na   | na   | na   | na   | na   | na   | na   | na   | na   |

## Kinetic equations

### Autoxidation with radical initiators

Initiation

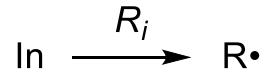

Propagation

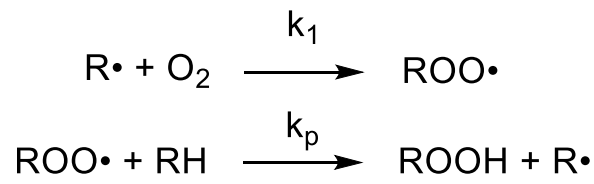

Termination

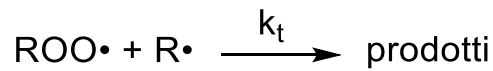

$$-\frac{d[\text{O}_2]}{dt} = k_1[\text{R}\cdot][\text{O}_2] \quad (1)$$

$$\frac{d[\text{R}\cdot]}{dt} = R_i + k_p[\text{ROO}\cdot][\text{RH}] - k_1[\text{R}\cdot][\text{O}_2] \quad (2)$$

$$\frac{d[\text{ROO}\cdot]}{dt} = k_1[\text{R}\cdot][\text{O}_2] - 2k_t[\text{ROO}\cdot]^2 - k_p[\text{ROO}\cdot][\text{RH}] \quad (3)$$

Using the steady state approximation for transient species we have:

$$R_i + k_p[\text{ROO}\cdot][\text{RH}] - k_1[\text{R}\cdot][\text{O}_2] = 0 \quad (4)$$

$$k_1[\text{R}\cdot][\text{O}_2] - 2k_t[\text{ROO}\cdot]^2 - k_p[\text{ROO}\cdot][\text{RH}] = 0 \quad (5)$$

By combining equations (4) and (5) one obtains:

$$R_i = 2k_t[\text{ROO}\cdot]^2 \quad (6)$$

$$[\text{ROO} \bullet] = \sqrt{\frac{R_i}{2k_t}} \quad (7)$$

Substituting equation (7) into (4) we have:

$$k_1[R \bullet][O_2] = R_i + k_p \sqrt{\frac{R_i}{2k_t}} [\text{RH}] \quad (8)$$

By replacing (8) with (1) the oxygen consumption rate is obtained:

$$-\frac{d[O_2]}{dt} = \frac{k_p}{\sqrt{2k_t}} [\text{RH}] \sqrt{R_i} + R_i \quad (9)$$

If the chain is then sufficiently long ( $> 30$ ) it is possible to neglect the oxygen consumption by the inhibitor ( $R_i$ ) compared to the consumption by the substrate.

Autoxidation inhibited by “chain breaking” antioxidants:

Initiation

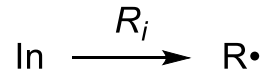

Propagation

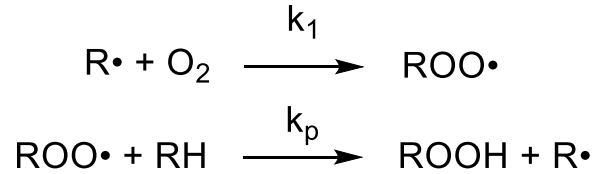

Termination

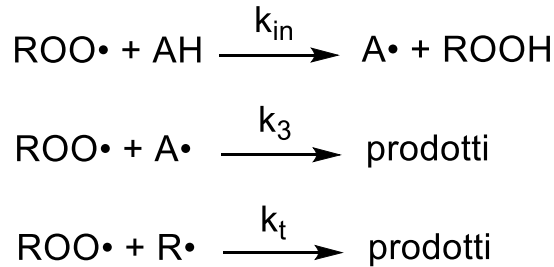

$$-\frac{d[\text{O}_2]}{dt} = k_1[\text{R}\cdot][\text{O}_2] \quad (1)$$

$$\frac{d[\text{R}\cdot]}{dt} = R_i + k_p[\text{ROO}\cdot][\text{RH}] - k_1[\text{R}\cdot][\text{O}_2] \quad (2)$$

$$\begin{aligned} \frac{d[\text{ROO}\cdot]}{dt} = k_1[\text{R}\cdot][\text{O}_2] - 2k_t[\text{ROO}\cdot]^2 - k_p[\text{ROO}\cdot][\text{RH}] + k_{in}[\text{ROO}\cdot][\text{AH}] - \\ k_3[\text{ROO}\cdot][\text{A}\cdot] \end{aligned} \quad (3)$$

$$\frac{d[\text{A}\cdot]}{dt} = k_{in}[\text{ROO}\cdot][\text{AH}] - k_3[\text{ROO}\cdot][\text{A}\cdot] \quad (4)$$

If applying the steady state approximation, the equations describing the rates of formation of radical species can be set equal to zero, therefore the (2) and the (4) become respectively:

$$k_1[\text{R}\cdot][\text{O}_2] = R_i + k_p[\text{ROO}\cdot][\text{RH}] \quad (5)$$

$$k_{in}[\text{ROO}\cdot][\text{AH}] = k_3[\text{ROO}\cdot][\text{A}\cdot] \quad (6)$$

Substituting these last two expressions in the equation (3) and applying the approximation of the steady state for the  $ROO\bullet$  species we have:

$$2k_t[ROO\bullet]^2 + 2k_{in}[ROO\bullet][AH] - R_i = 0 \quad (7)$$

By solving the second-degree equation with respect to  $[ROO\bullet]$  and ignoring the negative answer, equation 8 is obtained:

$$[ROO\bullet] = \frac{1}{2k_t} \left\{ -k_{in}[AH] + \sqrt{k_{in}^2[AH]^2 + 2k_t R_i} \right\} \quad (8)$$

Substituting equation (5) in (1) it is obtained:

$$-\frac{d[O_2]}{dt} = k_p[ROO\bullet][RH] + R_i \quad (9)$$

Substituting equation (8) for  $[ROO\bullet]$  we have:

$$-\frac{d[O_2]}{dt} = \frac{k_p[RH]}{2k_t} \left\{ -k_{in}[AH] + \sqrt{k_{in}^2[AH]^2 + 2k_t R_i} \right\} + R_i \quad (10)$$

The expression (10) is general in nature and represents oxygen consumption both in the absence and in the presence of an induction period. In the latter case it is possible to derive a simpler equation: in fact, in the presence of a good antioxidant, the recombination of peroxy radicals is negligible ( $2 ROO\bullet \rightarrow products$ ) because the termination rate with the antioxidant and the corresponding radical ( $ROO\bullet + AH$ ) are far more important. Based on these considerations, equation (7) becomes:

$$2k_{in}[ROO\bullet][AH] - R_i = 0 \quad (11)$$

from which we obtain:

$$[ROO\bullet] = \frac{R_i}{2k_{in}[AH]} \quad (12)$$

Substituting equation (12) in (9), the consumption of oxygen in the closed section will be given by:

$$-\frac{d[O_2]}{dt} = \frac{k_p[RH]R_i}{2k_{in}[AH]} + R_i \quad (13)$$

If the chain is long enough, the term  $R_i$  can be neglected, and the following equation is obtained:

$$-\frac{d[O_2]}{dt} = \frac{k_p[RH]R_i}{2k_{in}[AH]} \quad (14)$$

The formula for determining the  $R_i$  knowing the induction period is instead obtained from the following equations.

If considering the decay of the inhibitor,

$$-\frac{d[AH]}{dt} = k_{in}[AH][ROO \bullet] \quad (15)$$

in equation (15) we replace (12) and we obtain:

$$-\frac{d[AH]}{dt} = \frac{R_i}{2} \quad (16)$$

By integrating the differential equation we have:

$$-\int_0^t d[AH] = \frac{R_i}{2} \int_0^t dt \quad (17)$$

$$[AH]_0 - [AH]_t = \frac{R_i}{2} t \quad (18)$$

At time  $t = \tau$ , what is when all the inhibitor has been consumed, you get:

$$[AH]_0 = \frac{R_i}{2} \tau \quad (19)$$

Or:

$$R_i = \frac{2[AH]_0}{\tau} \quad (20)$$

The numerical term that appears in the numerator is the stoichiometric coefficient, that is, the number of peroxy radicals inactivated by each inhibitor molecule: it is equal to 2 because at the beginning of the calculations it was assumed that all  $A \bullet$  radicals trap a peroxy radical. With this formula it is therefore possible, from the initiation rate  $R_i$ , to obtain the induction time  $\tau$  or vice versa.
